# Supplementary material for: Three-dimensional multicomponent vesicles: dynamics and influence of material properties
Source: Royal Society of Chemistry journal article supplement (doi:10.1039/c8sm01087k), 2018-01-01
Supplement: c8sm01087k5.pdf [file c8sm01087k5.pdf]

## Electronic Supplementary Material for Three-Dimensional Multicomponent Vesicles: Dynamics & Influence of Material Properties

Prerna Gera\* and David Salac†

*Department of Mechanical and Aerospace Engineering,  
University at Buffalo, Buffalo, New York 14260-4400, USA*

(Dated: May 26, 2018)

### S1. CALCULATION OF INCLINATION ANGLE AND DEFORMATION PARAMETER

The shape and orientation of the three-dimensional vesicles are obtained via eigenvalues of the inertia matrix. Let  $\Omega^-$  be the region enclosed by the vesicle membrane. The inertia matrix is given by

$$\mathbf{I}_0 = \begin{bmatrix} \int_{\Omega^-} \hat{y}^2 + \hat{z}^2 \, dV & - \int_{\Omega^-} \hat{x}\hat{y} \, dV & - \int_{\Omega^-} \hat{x}\hat{z} \, dV \\ - \int_{\Omega^-} \hat{x}\hat{y} \, dV & \int_{\Omega^-} \hat{x}^2 + \hat{z}^2 \, dV & - \int_{\Omega^-} \hat{y}\hat{z} \, dV \\ - \int_{\Omega^-} \hat{x}\hat{z} \, dV & - \int_{\Omega^-} \hat{y}\hat{z} \, dV & \int_{\Omega^-} \hat{x}^2 + \hat{y}^2 \, dV \end{bmatrix}, \quad (\text{S1})$$

where  $\hat{x} = x - \bar{x}$ ,  $\hat{y} = y - \bar{y}$ , and  $\hat{z} = z - \bar{z}$ . The center of the vesicle,  $(\bar{x}, \bar{y}, \bar{z})$  is defined as

$$\bar{x} = \frac{1}{V} \int_{\Omega^-} x \, dV, \quad \bar{y} = \frac{1}{V} \int_{\Omega^-} y \, dV, \quad \bar{z} = \frac{1}{V} \int_{\Omega^-} z \, dV, \quad (\text{S2})$$

while the volume is given by  $V = \int_{\Omega^-} dV$ . In all cases the integrals are calculated using a numeric Heaviside function and the level-set describing the interface:

$$\int_{\Omega^-} f \, dV \approx \sum_{ijk} (1 - H(\phi_{ijk})) f_{ijk} h_x h_y h_z, \quad (\text{S3})$$

where  $f_{ijk}$  is the value of the function to be integrated at a grid point,  $h_x$ ,  $h_y$ , and  $h_z$  are the grid spacings in the  $x$ -,  $y$ -, and  $z$ -directions, respectively, and  $H(\phi)$  is the Heaviside function [1].

The symmetric matrix  $\mathbf{I}_0$  has three real eigenvalues and orthogonal eigenvectors [2]. The inclination angle is defined as the angle between the eigenvector corresponding to the largest eigenvalue and the  $x$ -axis. Following the definition of deformation parameter, or asphericity, is defined as [3, 4]

$$D = \frac{\lambda_{max} - \lambda_{min}}{\lambda_{max} + \lambda_{min}}, \quad (\text{S4})$$

where  $\lambda_{max}$  is the largest eigenvalue while  $\lambda_{min}$  is the smallest eigenvalue.

---

\*Present Address: Department of Mathematics, University of Wisconsin–Madison, Van Vleck Hall, 480 Lincoln Drive, Madison, WI 53706, USA

†Corresponding Author: davidosal@buffalo.edu

## S2. DESCRIPTION OF MOVIES

There are four movies included in this work. Each corresponds to a result presented in the main text and all have  $\bar{c} = 0.4$ . The movies includes are:

TABLE S1: Table of movies

| File Name      | Main Text Figure | $\alpha$ | $\kappa_c^B$ | Pe  |
|----------------|------------------|----------|--------------|-----|
| FIG2Movie.mov  | 2                | 20       | 0.6          | 0.2 |
| FIG3Movie.mov  | 3                | 20       | 0.7          | 0.5 |
| FIG4Movie.mov  | 4                | 20       | 0.8          | 1.0 |
| FIG10Movie.mov | 10               | 0.5      | 0.4          | 0.3 |

- 
- [1] J. D. Towers, *Journal of Computational Physics*, 2009, **228**, 3478–3489.  
[2] A. Laadhari, P. Saramito and C. Misbah, *Journal of Computational Physics*, 2014, **263**, 328–352.  
[3] L. Lu, W. J. Doak, J. W. Schertzer and P. R. Chiarot, *Soft Matter*, 2016, **12**, 7521–7528.  
[4] S. Messlinger, B. Schmidt, H. Noguchi and G. Gompper, *Phys. Rev. E*, 2009, **80**, 011901.
